# Supplementary material
Source: ML conference proceedings conference paper supplement (https://proceedings.neurips.cc/paper_files/paper/2021/hash/51a472c08e21aef54ed749806e3e6490-Abstract.html)
Supplement: Supplementary file 1 [file 51a472c08e21aef54ed749806e3e6490-Supplemental.zip]

Archive with 2 entries (2 files):
- Detailed example illustrating complete and incomplete subtrees.pdf
- Final_NeurIPS_Appendix.pdf
